# Supplementary material for: A multi-class classification algorithm based on hematoxylin-eosin staining for neoadjuvant therapy in rectal cancer: a retrospective study
Source: PeerJ. 2023 Jun 12;11:e15408. doi: 10.7717/peerj.15408 (PMC10269576; doi:10.7717/peerj.15408)
Supplement: Supplemental Information 1 [file peerj-11-15408-s001.xlsx]

## Sheet: Sheet1
class	name	gender(male0;female1)	age	Pretreatment T stage	Pretreatment N stage	Pretreatment CEA(≤5ng／ml:0;＞5ng／ml:1 )	Pretreatment CA199(≤34U/ml:0;)	Tumor location(upper:0;middl:1;lower:2)	Neoadjuvant chemotherapy regime	Cycles	neoadjuvant radiotherapy
0		0	63	4	1	0	0	2	Based on Capecitabine	6	yes
0		1	49	4	1	0	0	1	Based on Capecitabine	3	yes
0		1	31	4	1	0	0	1	Based on Capecitabine	6	yes
0		0	51	4	2	1	1	2	Based on 5-FU	7	no
0		0	56	4	1	0	0	1	Based on Capecitabine	2	yes
0		0	57	4	1	0	0	2	Based on Capecitabine	5	yes
0		0	66	4	1	1	1	0	Based on Capecitabine	6	yes
0		1	49	4	1	1	1	1	Based on 5-FU	6	yes
0		0	62	3	1	0	0	2	Based on 5-FU	6	yes
0		0	45	4	1	1	0	0	Based on Capecitabine	2	yes
0		1	35	4	1			2	Based on Capecitabine	2	yes
0		0	43	4	1	0	0	2	Based on Capecitabine		yes
0		0	42	4	2	0	0		Based on Capecitabine	6	yes
0		1	57	4	2	1	0		Based on Capecitabine	4	yes
0		0	60	3	2	0	0	2	Based on Capecitabine	4	yes
0		0	55	4	2	0	0		Based on Capecitabine	6	yes
0		1	45	3	0	0	0		Based on Capecitabine	2	yes
0		1	68	4	1	0	1		Based on Capecitabine	2	yes
0		0	68	3	1	0	0		Based on Capecitabine	4	yes
1		0	59	3	0	0	0	2	Based on Capecitabine	1	yes
1		0	34	3	1	0	0	2	Based on Capecitabine	6	yes
1		0	62	4	1	0	0	2	Based on Capecitabine	3	yes
1		1	69			1				1	yes
1		0	51	4	1	1	0	2	Based on Capecitabine	3	yes
1		1	24	3	1	1	0	2	Based on 5-FU	8	yes
1		0	74	4	1	0	0	1	Based on Capecitabine	4	no
1		1	51	4	1	0	0	2	Based on Capecitabine	4	yes
1		0	47	4	1	0	0	1	Based on Capecitabine	4	yes
1		0	60	4	1	1	0	2	Based on Capecitabine	3	yes
1		0	55	3	1	0	0	1	Based on Capecitabine	4	yes
1		1	43	4	1	0	0	1	Based on 5-FU	3	no
1		1	52	3	0	0	0	2	Based on 5-FU	6	yes
1		1	56	3	1	0	0	1	Based on Capecitabine	1	yes
1		1	33	4	1	1	0	1	Based on Capecitabine	3	no
1		1	57	4	2	1	0	2	Based on Capecitabine	2	yes
1		1	78	3	1	0	1	2	Based on Capecitabine	2	yes
1		0	64	3	1	1	1	1	Based on 5-FU	2	yes
1		0	51	3	1	0	0	1	Based on 5-FU	8	no
1		0	55	4	1	1	0	1	Based on Capecitabine	7	yes
1		1	57	4	1	0	0	1	Based on Capecitabine	8	yes
1		0	65	4	2	1	1	1	Based on Capecitabine	3	yes
1		0	53	3	2	0	0	2	Based on Capecitabine	6	yes
1		0	51	4	1	1	1	1	Based on 5-FU	4	no
1		0	65	3	1	1	0	2	Based on Capecitabine	5	yes
1		0	76	4	2	1	1	2	Based on Capecitabine	1	yes
1		0	57	4	1	0	0	2	Based on Capecitabine	3	no
1		0	65	4	1	0	1	1	Based on Capecitabine	3	yes
1		1	47	3	1	0	0	1	Based on Capecitabine	4	yes
1		1	62	3	2	1	0	1	Based on Capecitabine	4	yes
1		0	46	4	2	0	0	2	Based on Capecitabine	3	no
1		0	66	3	1	0	0	2	Based on Capecitabine	2	yes
1		1	71	4	1	1	1	1	Based on Capecitabine	2	yes
1		1	56	4	1	1	1	0	Based on 5-FU	6	no
1		0	72	4	1	0	0	1	Based on Capecitabine	1	yes
1		1	54	4	1	1	1	1	Based on Capecitabine	1	yes
1		0	49	3	2	0	0	2	Based on Capecitabine	1	yes
1		0	46	3	1	0	0	1	Based on Capecitabine	4	yes
1		0	67	3	1	0	0	2	Based on Capecitabine	2	yes
1		1	67		2	0	0	2	Based on 5-FU	3	yes
1		0	34	3	1	1	0	2	Based on Capecitabine	2	yes
1		1	57	4	1	1	1		Based on 5-FU	11	no
1		0	70	4	2	0	0	2	Based on Capecitabine	1	yes
1		1	55	4	0	0	1	2	Based on Capecitabine	1	yes
1		0	67	4	1	1	0	2	Based on Capecitabine	2	yes
1		0	59	3	1	1	1	2	Based on 5-FU	6	no
1		0	71	4	1	0	0	2	Based on Capecitabine	1	yes
1		1	54	4	1	0	1	0	Based on Capecitabine	5	yes
1		0	52	4	1	0	0	0	Based on Capecitabine	3	no
1		0	55	4	1	0	0	2	Based on Capecitabine	2	yes
1		0	48	4	1	1	0	1	Based on 5-FU	6	yes
2		0	64	2	0	0	0	1	Based on Capecitabine	1	yes
2		0	54	4	1	0	0	1	Based on Capecitabine	2	yes
2		0	50	4	1	0	0	1	Based on Capecitabine	3	no
2		1	22	4	1	0	0	0	Based on Capecitabine	3	no
2		1	43	3	1	0	0	2	Based on Capecitabine	1	yes
2		1	44		2	1	1	2	Based on 5-FU	4	no
2		0	49	4	1	1	1	2	Based on 5-FU	3	yes
2		0	75	2	0	0	0		Based on Capecitabine	2	no
2		0	55	3	2	0	0	2
2		0	50	3	2	1	1	1	Based on Capecitabine	6	yes
2		1	52	4	2	0	1	1	Based on Capecitabine	2	no
2		0	56	3	2	1	1	0	Based on 5-FU	15	no
2		0	51	4	2	0	0	1	Based on Capecitabine	6	yes
2		1	75	3	1	1	0	1	Based on Capecitabine	3	yes
2		0	84	3	0	0	0	0	Based on Capecitabine	1	yes
2		0	36	4	1	1	0	2	Based on Capecitabine	2	yes
2		0	65	4	1	0	1	1	Based on Capecitabine	3	no
2		0	59	4	1	1	1	2	Based on Capecitabine	3	yes
2		1	54	4	1	0	0	1	Based on 5-FU	4	no
2		0	63	4	2	0	0	1	Based on Capecitabine	4	yes
2		0	60	4	0	0	0		Based on Capecitabine	1	yes
2		0	63	4	1	0	0	1	Based on Capecitabine	3	no
2		1	69	4	1	0	0	1	Based on Capecitabine	4	no
2		0	63	4	1	0	0	0	Based on Capecitabine	4	no
